# Supplementary material for: A wash-durable polyelectrolyte complex that extinguishes flames on polyester–cotton fabric
Source: Royal Society of Chemistry journal article supplement (doi:10.1039/c6ra03637f), 2016-01-01
Supplement: c6ra03637f1.pdf [file c6ra03637f1.pdf]

Electronic Supplementary Information

## Wash-Durable Polyelectrolyte Complex that Extinguishes Flame on Polyester-Cotton Fabric

Merid Haile, Marcus Leistner, Owais Sarwar, Courtney Toler, Robert Henderson, Jaime C. Grunlan

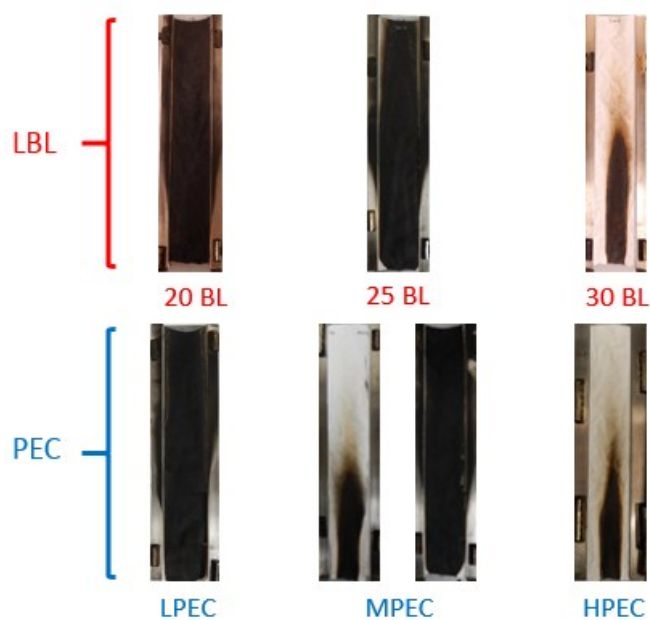

Fig. S1. Images of coated fabric residues after vertical flame testing.

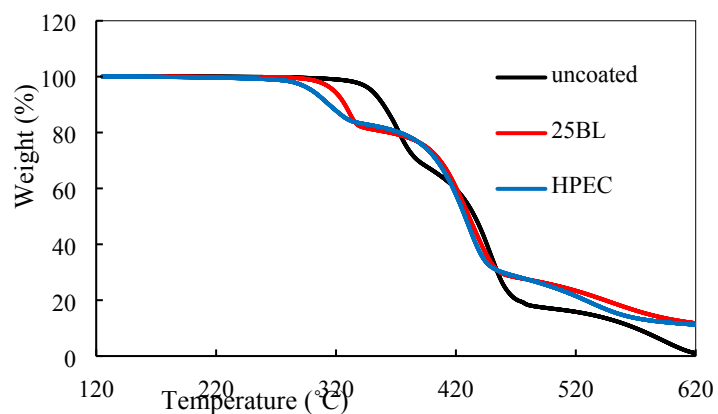

Fig. S2. Representative TGA weight loss, as a function of temperature, in oxidizing atmosphere.

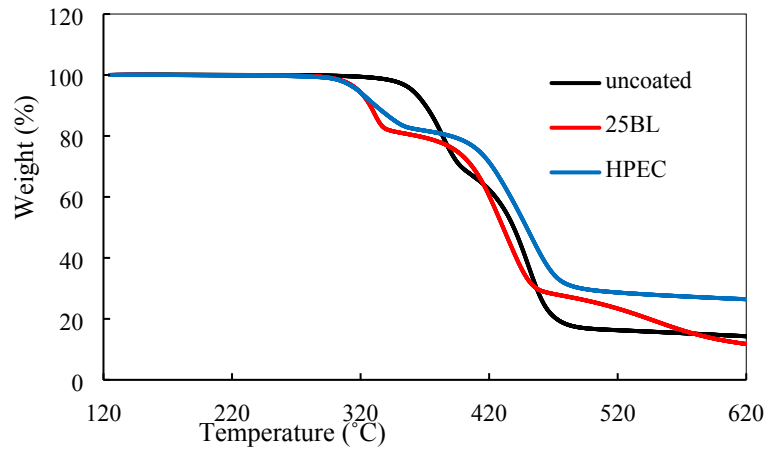

Fig. S3. Representative TGA weight loss, as a function of temperature, of uncoated and coated PECO fabrics in nitrogen atmosphere.

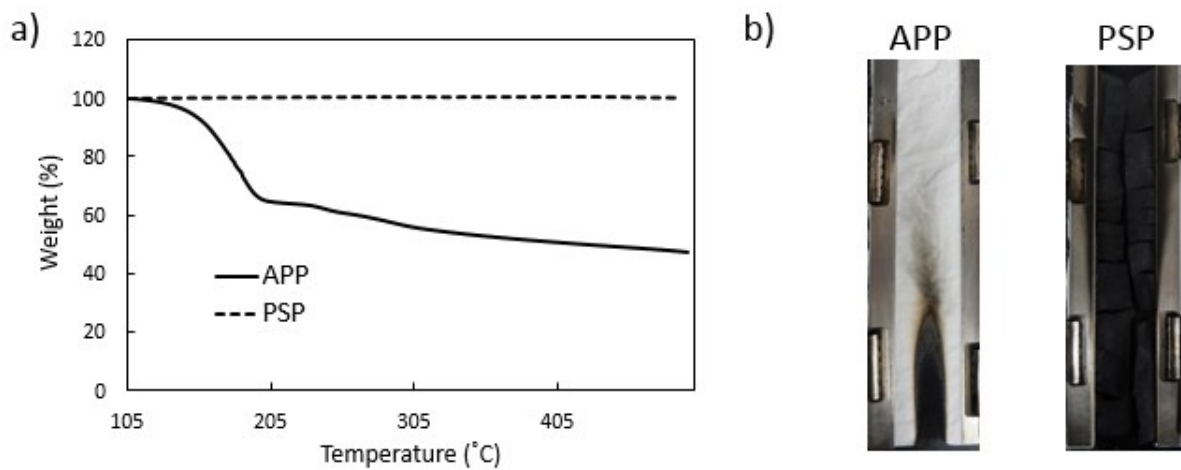

Fig. S4. Thermogravimetric analysis of ammonium polyphosphate (APP) and poly(sodium phosphate) PSP (a). APP and PSP-coated PECO after vertical flame testing (b).
